# Supplementary material
Source: publisher figshare collection journal article supplement (https://tandf.figshare.com/ndownloader/files/36573952)
Supplement: Supplementary file 1 [file 36573952]

Supplementary table

Validation results of the analytical method by HPLC

| Parameter | Data |
| --- | --- |
| Linearity | y = 25.14 x + 6.31 (R2 = 0.9992) |
| Range | 9.8–49.0 μg/mL |
| Detection limit | 0.49 μg/mL |
| Quantitation limit | 1.63 μg/mL |
| Repeatability (%RSD)Ꝕ | 1.2 % |
| Recovery rateֆ | 97.2 % |

Ꝕ GA concerention: 19.6 μg/mL (n=6)

ֆ GA concerention: 75, 100 and 125% of 19.6 μg/mL (n=3). Average of the three levels

All of this was carried out according to the guidelines set by the International Conference on Harmonisation.
